# Supplementary material
Source: ML conference proceedings conference paper supplement (https://openaccess.thecvf.com/content/CVPR2021/html/Yu_PCLs_Geometry-Aware_Neural_CVPR_2021_paper.html)
Supplement: Supplementary file 1 [file Yu_PCLs_Geometry-Aware_Neural_CVPR_2021_supplemental.zip]

Archive with 2 entries (2 files):
- 03459-supp/supplementary.pdf
- 03459-supp/video.mp4
